# Supplementary material
Source: Springer Nature journal article supplement (https://www.springermedizin.de/resource/supplementary/13075_2010_3083_MOESM3_ESM.pdf/9693702)
Supplement: MOESM3 [file 9693702]

## Tables and Captions

**Table 1. Characteristics of Study Population by Gender and Serum Uric Acid Quartile**

|                                       | WOMEN (N=1287)            |                           |                           |                           | MEN (N=1211)              |                           |                           |                          |
|---------------------------------------|---------------------------|---------------------------|---------------------------|---------------------------|---------------------------|---------------------------|---------------------------|--------------------------|
|                                       | Quartile 1                | Quartile 2                | Quartile 3                | Quartile 4                | Quartile 1                | Quartile 2                | Quartile 3                | Quartile 4               |
| sUA Range, $\mu\text{mol/L}$ [mg/dL]  | 77, 196 [1.3, 3.3]        | 196, 226 [3.3, 3.8]       | 232, 274 [3.9, 4.6]       | 280, 636 [4.7, 10.7]      | 155, 291 [2.6, 4.9]       | 297, 333 [5.0, 5.6]       | 339, 393 [5.7, 6.6]       | 399, 690 [6.7, 11.6]     |
| Age, years                            | 40.1 (3.8)                | 40.1 (3.6)                | 40.3 (3.6)                | 40.5 (3.8)                | 40.1 (3.6)                | 39.8 (3.5)                | 40.4 (3.5)                | 40.4 (3.6)               |
| African-American                      | 43.5%                     | 42.6%                     | 46.5%                     | 57.5%                     | 42.7%                     | 37.4%                     | 42.5%                     | 43.2%                    |
| Body mass index, $\text{kg/m}^2$      | 24.8 (4.7)                | 27.2 (6.2)                | 29.6 (6.8)                | 33.1 (7.2)                | 26.1 (3.8)                | 27.4 (4)                  | 28.1 (4.5)                | 30.1 (4.6)               |
| Alcohol, ml/Day                       | 6.2 (10)                  | 5.7 (11.8)                | 9 (32.7)                  | 9.1 (22)                  | 13.3 (35.4)               | 14.2 (25.1)               | 16.2 (24.4)               | 20.3 (35.1)              |
| Smokers                               | 36.6%                     | 39.7%                     | 38.%                      | 46.2%                     | 35.3%                     | 39.4%                     | 39.3%                     | 40.2%                    |
| Systolic BP, mmHg                     | 107 (12.5)                | 109.3 (14)                | 112.4 (15.3)              | 115.5 (16.3)              | 111.7 (11.2)              | 114.8 (13.5)              | 115.4 (12.9)              | 118.3 (14.7)             |
| Diastolic BP, mm Hg                   | 69.6 (10.1)               | 71.5 (10.2)               | 73.3 (10.9)               | 75.9 (12.6)               | 73.3 (9.2)                | 76.3 (11)                 | 76.8 (10.2)               | 79.2 (12.1)              |
| Serum fasting glucose, mmol/L [mg/dL] | 4.45 (.40) [80.2 (7.2)]   | 4.48 (.43) [80.7 (7.7)]   | 4.5 (.45) [81.1 (8.1)]    | 4.7 (.53) [84.3 (9.5)]    | 4.7 (.46) [84.0 (8.3)]    | 4.8 (.53) [85.7 (9.6)]    | 4.8 (.52) [86.4 (9.4)]    | 4.9 (.54) [88.8 (9.7)]   |
| Serum HDL-C, mmol/L [mg/dL]           | 1.54 (.33) [59.7 (12.8)]  | 1.44 (.35) [55.5 (13.5)]  | 1.45 (.36) [56 (14.1)]    | 1.32 (.37) [51 (14.4)]    | 1.24 (.33) [48.0 (12.9)]  | 1.19 (.32) [45.9 (12.4)]  | 1.14 (.31) [43.9 (11.8)]  | 1.10 (.33) [42.4 (12.6)] |
| Serum LDL-C, mmol/L [mg/dL]           | 2.72 (.73) [105.1 (28.2)] | 2.74 (.74) [105.9 (28.7)] | 2.80 (7.7) [108.4 (29.8)] | 3.01 (.79) [116.3 (30.6)] | 2.87 (.74) [110.9 (28.5)] | 3.12 (.81) [120.5 (31.5)] | 3.19 (.95) [123.5 (36.6)] | 3.23 (.92) [125 (35.7)]  |

|                                                                    |                            |                            |                            |                              |                             |                              |                              |                                |
|--------------------------------------------------------------------|----------------------------|----------------------------|----------------------------|------------------------------|-----------------------------|------------------------------|------------------------------|--------------------------------|
| Serum Triglycerides, mmol/L [mg/dL]                                | .78 (.38)<br>[68.8 (33.8)] | .89 (.44)<br>[78.7 (39.1)] | .95 (.52)<br>[84.5 (45.8)] | 1.27 (.80)<br>[112.6 (70.7)] | 1.01 (.67)<br>[89.8 (59.7)] | 1.26 (.76)<br>[111.5 (67.4)] | 1.52 (1.87)<br>[135 (165.7)] | 1.86 (1.76)<br>[164.8 (156.1)] |
| Serum Creatinine, $\mu$ mol/L [mg/dL]                              | 79.6 (8.8)<br>[0.9 (0.1)]  | 79.6 (8.8)<br>[0.9 (0.1)]  | 79.6 (8.8)<br>[0.9 (0.1)]  | 79.6 (8.8)<br>[0.9 (0.1)]    | 97.2 (8.8)<br>[1.1 (0.1)]   | 97.2 (8.8)<br>[1.1 (0.1)]    | 97.2 (17.7)<br>[1.1 (0.2)]   | 97.2 (17.7)<br>[1.1 (0.2)]     |
| Waist circumference, cm                                            | 76.6 (10.1)                | 81.6 (12.1)                | 86.3 (13.1)                | 94 (14.1)                    | 87.8 (9.5)                  | 91.8 (9.6)                   | 93.5 (11)                    | 98.4 (10.9)                    |
| eGFR, Abbreviated MDRD                                             | 87.2 (15.1)                | 85.6 (15.5)                | 83.9 (14.2)                | 82.7 (15.2)                  | 89.9 (13.6)                 | 88.3 (14.1)                  | 87.1 (19.3)                  | 85.6 (16.1)                    |
| Framingham Score                                                   | -4.8 (4.1)                 | -3.7 (4.3)                 | -3.3 (4.4)                 | -1.4 (4.3)                   | 1.1 (2.2)                   | 1.8 (2.4)                    | 2.3 (2.3)                    | 2.7 (2.4)                      |
| <del>Metabolic Syndrome (ATP-III) C-Reactive Protein (mg/dL)</del> | <del>1.3%5(2.9)</del>      | <del>41.5%(1.7)</del>      | <del>8.1%.6(2.9)</del>     | <del>231.8(1.7%)</del>       | <del>4%1.7(2.9)</del>       | <del>1.8.9%(2.0)</del>       | <del>42.3%2.0(2.5)</del>     | <del>21.9%2.1(2.5)</del>       |
| <del>Metabolic Syndrome (WHO)</del>                                | <del>.0% 0.3%</del>        | <del>0.9%</del>            | <del>3.1% 0.3%</del>       | <del>4.0%</del>              | <del>4.5.% 6.6%</del>       |                              |                              |                                |

---

HDL = High Density Lipoprotein; LDL = Low Density Lipoprotein; eGFR = Estimated glomerular filtration rate; WHO = World Health Organization; ATP = Adult Treatment Panel; MDRD = Modification of Diet in Renal Disease. Data are range, mean (SD), or percent.

---
